# Supplementary material for: Electrocardiographic findings in 130 hospitalized neonatal calves with diarrhea and associated potassium balance disorders
Source: PubMed Central journal article supplement — J Vet Intern Med. 2018 Jun 26;32(4):1447–61. doi: 10.1111/jvim.15220 (PMC6060331; doi:10.1111/jvim.15220), 2018-06-26
Supplement: JVIM-32-1447-s001.pdf [file JVIM-32-1447-s001.pdf]

**Table S1.** Spearman's coefficients of correlation between ECG measurements and selected electrolyte and acid-base variables in 130 diarrheic calves  $\leq 21$  days of age.

| Variable               | K <sup>+</sup> | K <sup>+</sup> /Na <sup>+</sup> | Na <sup>+</sup> | Cl <sup>-</sup> | Ca <sup>2+</sup> | Mg <sup>2+</sup> | pH      | pCO <sub>2</sub> | HCO <sub>3</sub> <sup>-</sup> | BE      | AG      | Crea    |
|------------------------|----------------|---------------------------------|-----------------|-----------------|------------------|------------------|---------|------------------|-------------------------------|---------|---------|---------|
| Heart rate             | NS             | NS                              | 0.26*           | NS              | NS               | 0.18*            | NS      | NS               | NS                            | NS      | 0.27*   | NS      |
| P amplitude            | NS             | NS                              | 0.19*           | NS              | 0.35**           | 0.27*            | -0.30*  | NS               | -0.20*                        | -0.25*  | 0.24*   | NS      |
| R amplitude            | NS             | NS                              | NS              | NS              | 0.24*            | NS               | NS      | NS               | NS                            | NS      | NS      | -0.26*  |
| S amplitude            | -0.36**        | -0.31**                         | NS              | NS              | -0.22*           | -0.59**          | 0.48**  | NS               | 0.40**                        | 0.44**  | -0.54** | -0.53** |
| T amplitude            | 0.36**         | 0.36**                          | NS              | NS              | 0.18*            | 0.39**           | -0.36** | NS               | -0.32**                       | -0.34** | 0.45**  | 0.41**  |
| J amplitude            | NS             | NS                              | NS              | NS              | NS               | 0.20*            | NS      | NS               | NS                            | NS      | 0.20*   | 0.31**  |
| P duration             | -0.18*         | NS                              | NS              | NS              | NS               | NS               | NS      | NS               | NS                            | NS      | NS      | NS      |
| PR interval            | -0.22*         | NS                              | NS              | 0.22*           | 0.18*            | NS               | -0.27*  | -0.34**          | -0.31*                        | -0.31*  | NS      | NS      |
| QRS duration           | 0.35**         | 0.35**                          | NS              | NS              | NS               | 0.51**           | -0.42** | -0.23*           | -0.39**                       | -0.41** | 0.42**  | 0.54**  |
| QT interval            | -0.20*         | NS                              | NS              | NS              | NS               | NS               | NS      | -0.25*           | -0.17*                        | NS      | NS      | NS      |
| QTc Friderica          | -0.21*         | -0.22*                          | NS              | 0.18*           | NS               | NS               | NS      | -0.27*           | -0.20*                        | -0.19*  | NS      | NS      |
| ST duration            | -0.42**        | -0.41**                         | NS              | 0.18*           | NS               | -0.24*           | NS      | NS               | NS                            | NS      | -0.29*  | -0.34** |
| ST amplitude           | NS             | NS                              | NS              | NS              | NS               | 0.18*            | -0.24*  | NS               | -0.21*                        | -0.22*  | 0.28*   | 0.22*   |
| ST angle               | 0.28*          | 0.28*                           | NS              | NS              | NS               | 0.20*            | -0.21*  | NS               | NS                            | -0.17*  | 0.30*   | 0.21*   |
| JT max                 | -0.46**        | -0.43**                         | NS              | 0.20*           | NS               | -0.30*           | NS      | -0.17*           | NS                            | NS      | -0.33** | -0.36*  |
| JT end                 | -0.38**        | -0.35**                         | NS              | NS              | NS               | -0.23*           | NS      | -0.18*           | NS                            | NS      | -0.26*  | -0.27*  |
| T peakedness index     | 0.38**         | 0.35**                          | NS              | NS              | 0.21*            | 0.41**           | -0.32** | NS               | -0.26*                        | -0.29*  | 0.45*   | 0.39**  |
| T to S amplitude ratio | NS             | NS                              | NS              | NS              | NS               | NS               | NS      | NS               | NS                            | NS      | NS      | NS      |

NS = not significant, \* $P < 0.05$ , \*\*  $P < 0.001$ .

K<sup>+</sup>/Na<sup>+</sup>, Plasma potassium to sodium ratio; pCO<sub>2</sub>, partial pressure of carbon dioxide; BE, Base excess; AG, Anion gap; Crea, Creatinine.
