# Supplementary material for: Electrocardiographic findings in 130 hospitalized neonatal calves with diarrhea and associated potassium balance disorders
Source: PubMed Central journal article supplement — J Vet Intern Med. 2018 Jun 26;32(4):1447–61. doi: 10.1111/jvim.15220 (PMC6060331; doi:10.1111/jvim.15220), 2018-06-26
Supplement: JVIM-32-1447-s002.pdf [file JVIM-32-1447-s002.pdf]

**Table S2.** Amplitudes, durations and coefficients of variation of duplicate ECG measurements of bipolar limb leads (I, II, III) and a base apex lead in 20 neonatal diarrheic calves.

| Variable                      |    | Lead II |      |      | Lead I |      |      | Lead III |      |      | Lead Base-Apex |      |      | P-value |
|-------------------------------|----|---------|------|------|--------|------|------|----------|------|------|----------------|------|------|---------|
|                               |    | Median  | IQI  | VI   | Median | IQI  | VI   | Median   | IQI  | VI   | Median         | IQI  | VI   |         |
| P amplitude (mV)              | M1 | 0.18    | 0.15 | 0.83 | 0.16   | 0.11 | 0.69 | 0.06*    | 0.06 | 1.0  | 0.20           | 0.12 | 0.60 | < 0.001 |
|                               | M2 | 0.18    | 0.13 | 0.72 | 0.16   | 0.12 | 0.75 | 0.05*    | 0.06 | 1.2  | 0.20           | 0.13 | 0.65 | < 0.001 |
| R amplitude (mV)              | M1 | 0.04    | 0.06 | 1.5  | 0.04   | 0.06 | 1.5  | 0.04     | 0.16 | 4.0  | 0.03           | 0.04 | 1.33 | 0.96    |
|                               | M2 | 0.04    | 0.06 | 1.5  | 0.04   | 0.06 | 1.5  | 0.03     | 0.17 | 5.7  | 0.03           | 0.04 | 1.33 | 0.95    |
| S amplitude (mV) <sup>1</sup> | M1 | -1.63   | 0.42 | 0.26 | -0.98* | 0.84 | 0.86 | -0.68*   | 0.84 | 1.24 | -1.68          | 0.83 | 0.49 | < 0.001 |
|                               | M2 | -1.72   | 0.49 | 0.28 | -1.14* | 0.77 | 0.68 | -0.70*   | 0.89 | 1.27 | -1.76          | 0.81 | 0.46 | < 0.001 |
| T amplitude (mV)              | M1 | 0.65    | 0.41 | 0.63 | 0.40   | 0.56 | 1.40 | 0.23*    | 0.49 | 2.13 | 0.59           | 0.49 | 0.83 | < 0.001 |
|                               | M2 | 0.64    | 0.38 | 0.59 | 0.43   | 0.53 | 1.23 | 0.21*    | 0.54 | 2.57 | 0.60           | 0.47 | 0.78 | < 0.001 |
| QRS duration (ms)             | M1 | 72      | 18.5 | 0.26 | 70     | 16   | 0.23 | 67       | 11.5 | 0.17 | 76             | 14   | 0.18 | 0.17    |
|                               | M2 | 72      | 17.5 | 0.24 | 70     | 15   | 0.21 | 71       | 17   | 0.24 | 78             | 16   | 0.21 | 0.23    |
| QTc Frederica (ms)            | M1 | 322     | 52   | 0.16 | 318    | 47   | 0.15 | 298      | 58   | 0.19 | 323            | 53   | 0.16 | 0.61    |
|                               | M2 | 321     | 52   | 0.16 | 321    | 49   | 0.15 | 302      | 62   | 0.21 | 320            | 45   | 0.14 | 0.85    |
| ST duration (ms)              | M1 | 74      | 54   | 0.73 | 85     | 53   | 0.62 | 91       | 24   | 0.26 | 72             | 35   | 0.49 | 0.38    |
|                               | M2 | 72      | 35   | 0.49 | 77     | 49   | 0.64 | 91       | 43   | 0.47 | 74             | 32   | 0.43 | 0.31    |
| T duration (ms)               | M1 | 100     | 28   | 0.28 | 92     | 36   | 0.39 | 83*      | 31   | 0.37 | 102            | 35   | 0.34 | 0.040   |
|                               | M2 | 101     | 27   | 0.27 | 96     | 28   | 0.29 | 77*      | 32   | 0.42 | 101            | 24   | 0.24 | 0.003   |
| ST amplitude (mV)             | M1 | 0.05    | 0.06 | 1.2  | 0.02*  | 0.03 | 1.5  | 0.04     | 0.06 | 1.5  | 0.05           | 0.07 | 1.4  | 0.019   |
|                               | M2 | 0.05    | 0.06 | 1.2  | 0.03   | 0.05 | 1.67 | 0.03     | 0.07 | 2.3  | 0.06           | 0.04 | 0.67 | 0.068   |
| ST angle (°)                  | M1 | 3       | 2    | 0.67 | 1.5    | 3    | 2    | 2*       | 2.75 | 1.38 | 2.5            | 4.75 | 1.9  | 0.021   |
|                               | M2 | 3       | 3.5  | 1.2  | 1.5    | 3    | 2    | 2        | 2.75 | 1.38 | 2              | 4    | 2.0  | 0.14    |
| Ratio of T to S amplitude     | M1 | 0.43    | 0.24 | 0.56 | 0.43   | 0.33 | 0.77 | 0.26*    | 0.51 | 1.96 | 0.44           | 0.22 | 0.5  | 0.057   |
|                               | M2 | 0.41    | 0.25 | 0.61 | 0.41   | 0.31 | 0.76 | 0.20*    | 0.67 | 3.4  | 0.44           | 0.18 | 0.41 | 0.036   |

M1, measurement 1; M2, measurement 2; IQI, intraquartile interval; VI, variability index calculated as the ratio of the intraquartile interval to the median. Values with asterisks are significantly different from lead II measurements ( $P \leq 0.0167$ ).

<sup>1</sup>Median values of the S amplitude were multiplied with a factor of -1 for calculation of VI values.
